# Supplementary material for: Near-global-scale high-resolution seasonal simulations with WRF-Noah-MP v.3.8.1
Source: Copernicus journal article supplement (doi:10.5194/gmd-13-1959-2020), 2020-04-21
Supplement: Supplementary file 1 [file gmd-13-1959-2020-supplement.pdf]

Supplement of Geosci. Model Dev., 13, 1959–1974, 2020  
<https://doi.org/10.5194/gmd-13-1959-2020-supplement>  
© Author(s) 2020. This work is distributed under  
the Creative Commons Attribution 4.0 License.

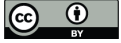

*Supplement of*

## **Near-global-scale high-resolution seasonal simulations with WRF-Noah-MP v.3.8.1**

**Thomas Schwitalla et al.**

*Correspondence to:* Thomas Schwitalla ([thomas.schwitalla@uni-hohenheim.de](mailto:thomas.schwitalla@uni-hohenheim.de))

The copyright of individual parts of the supplement might differ from the CC BY 4.0 License.

```

&time_control
  run_days           = 0,
  run_hours          = 0,
  run_minutes        = 0,
  run_seconds        = 0,
  start_year         = 2015,
  start_month        = 05,
  start_day          = 08,
  start_hour         = 00,
  start_minute       = 00,
  start_second       = 00,
  end_year           = 2015,
  end_month          = 05,
  end_day            = 09,
  end_hour           = 18,
  end_minute         = 00,
  end_second         = 00,
  interval_seconds   = 21600,
  input_from_file    = .true.,
  history_interval   = 360,
  frames_per_outfile = 1,
  restart            = .true.,
  restart_interval   = 360,
  io_form_history    = 11,
  io_form_restart    = 11,
  io_form_input      = 11,
  io_form_boundary   = 11,
  io_form_auxinput1  = 11
  debug_level        = 0,
  cycling            = .false.,
  use_netcdf_classic = .true.
  diag_print=2,
  auxhist23_outname='wrpress_d<domain>_<date>'
  io_form_auxhist23 = 11,
  auxhist23_interval=360,
  frames_per_auxhist23 = 1,
  nocolons= .true.
  io_form_auxinput4  = 11
  auxinput4_inname   = "wrflowinp_d<domain>"
  auxinput4_interval = 360
  iofields_filename = "additional_fields_2d.txt"
  ignore_iofields_warning = .false.
  auxhist7_outname='surface_d<domain>_<date>'
  io_form_auxhist7 = 11
  auxhist7_interval = 30,
  frames_per_auxhist7 = 1
  override_restart_timers=.true.
/

&diags
  p_lev_diags        = 1
  num_press_levels   = 10
  press_levels       = 100000, 92500, 85000, 70000,
60000, 50000, 40000, 30000, 20000, 10000
  use_tot_or_hyd_p   = 2

```

/

```
&domains
time_step                = 10,
time_step_fract_num      = 0,
time_step_fract_den      = 1,
max_dom                  = 1,
e_we                    = 12000,
e_sn                    = 4060,
num_metgrid_levels      = 138,
p_top_requested          = 1000.
eta_levels =
1.000,0.997,0.993,0.989,0.983,0.972,0.962,0.952,0.942,0.932,0.917,0.903,0
.889,0.875,0.852,0.826,0.799,0.771,0.748,0.725,0.7,0.678,0.653,0.628,0.59
0,0.557,0.515,0.480,0.445,0.410,0.375,0.340,0.305,0.280,0.25,0.219,0.191,
0.174,0.157,0.142,0.128,0.114,0.102,0.091,0.080,0.070,0.061,0.052,0.044,0
.037,0.030,0.024,0.018,0.013,0.008,0.003,0.000,
e_vert                  = 57,
dx                      = 3335.324,3335.324
dy                      = 3335.324,3335.324
grid_id                 = 1,
parent_id               = 1,
i_parent_start          = 1,
j_parent_start          = 1,
parent_grid_ratio        = 1,
parent_time_step_ratio  = 1,
feedback                = 0,
smooth_option           = 0,
use_surface              = .false.,
use_adaptive_time_step  = .false.
adaptive time stepping, ARW only
step_to_output_time     = .true.
target_cfl              = 1.2,
max_step_increase_pct   = 10,
starting_time_step      = 10,
max_time_step           = 14,
min_time_step           = -1,
/
```

```
&physics
sst_update              = 1,
mp_physics               = 8,
ra_lw_physics           = 4,
ra_sw_physics           = 4,
radt                    = 3,
sf_sfclay_physics       = 1,1,
sf_surface_physics      = 4,4,
bl_pbl_physics          = 1,
YSU_TOPDOWN_PBLMIX      =
                        = 1,
bldt                    = 0,
topo_wind               = 2,
cu_physics              = 0,
cudt                    = 5,
isfflx                  = 1,
```

```

ifsnow                = 1,
icloud                = 3,
surface_input_source = 1,
num_soil_layers      = 4,
mp_zero_out          = 0,
sf_urban_physics     = 0,
maxiens              = 1,
maxens               = 3,
maxens2              = 3,
maxens3              = 16,
ensdim               = 144,
slope_rad            = 1,
topo_shading         = 0,
num_land_cat         = 22,
iz0tlnd              = 1,
shcu_physics         = 3,
do_radar_ref = 0
sf_lake_physics = 0
o3input              = 2
aer_opt= 2
aer_aod550_opt = 2
aer_asy_opt = 3
aer_angexp_opt = 3
aer_ssa_opt = 3
usemonalb = .true.
rdlai2d = .true.
hail_opt = 1
seaice_threshold = 271.5
seaice_thickness_default= 1.
seaice_albedo_opt = 0
/

```

```

&noah_mp
dveg=9
opt_crs=1
opt_sfc=1
opt_btr=2
opt_run=3
opt_frz=1
opt_inf=2
opt_rad=3
opt_alb=2
opt_snf=1
opt_tbot=2
opt_stc=1
opt_gla=1
/

```

```

&fdda
  grid_fdda                = 0,
/

```

```

&dynamics
w_damping                = 1,
gwd_opt                  = 0,

```

```
diff_opt           = 2,  
km_opt            = 4,  
diff_6th_opt      = 2,  
diff_6th_factor   = 0.12,  
base_temp         = 290.  
damp_opt          = 3,  
zdamp             = 5000.,  
dampcoef          = 0.2,  
khdif            = 0,  
kvdif            = 0,  
non_hydrostatic  = .true.,  
moist_adv_opt     = 1,  
scalar_adv_opt    = 1,  
use_input_w       = .true.  
epssm = 0.8  
base_lapse_strat = -11.  
/  

```

```
&bdy_control  
spec_bdy_width    = 5,  
spec_zone         = 1,  
relax_zone        = 4,  
!spec_exp = 0.33  
specified         = .true.,  
nested            = .false.,  
periodic_x        = .true.  
/  

```
